# Supplementary material for: Resilience and frailty among gynecological patients in oncological treatment: the chain mediating role of stigma and health literacy
Source: Frontiers journal article supplement (doi:10.3389/fpsyt.2025.1497074), 2025-04-02
Supplement: Data_Sheet_1.pdf [file Data_Sheet_1.pdf]

Health Literacy Management Scale (HeLMS)

|                                 | Item                                                                                          | Very Incompetent | Extremely Difficult | Somewhat Difficult | A Little Difficult | No Difficulty |
|---------------------------------|-----------------------------------------------------------------------------------------------|------------------|---------------------|--------------------|--------------------|---------------|
| Information Acquisition Ability | Is it challenging to read health brochures?                                                   | 1                | 2                   | 3                  | 4                  | 5             |
|                                 | Can you make health decisions based on the information provided by doctors?                   | 1                | 2                   | 3                  | 4                  | 5             |
|                                 | Do you need help to read written information?                                                 | 1                | 2                   | 3                  | 4                  | 5             |
|                                 | Are you able to understand health information encountered in daily life?                      | 1                | 2                   | 3                  | 4                  | 5             |
|                                 | Are you able to strictly follow medical advice for treatment?                                 | 1                | 2                   | 3                  | 4                  | 5             |
|                                 | Can you go to the hospital alone for medical treatment?                                       | 1                | 2                   | 3                  | 4                  | 5             |
|                                 | Can you obtain the information you need through communication with doctors?                   | 1                | 2                   | 3                  | 4                  | 5             |
|                                 | Can you fill out medical forms by yourself?                                                   | 1                | 2                   | 3                  | 4                  | 5             |
| Communication Interaction       | Can you find the information you need from a large amount of information?                     | 1                | 2                   | 3                  | 4                  | 5             |
|                                 | Are you proactive in seeking answers to things you don't understand about your health?        | 1                | 2                   | 3                  | 4                  | 5             |
|                                 | Can you ask family or friends to help you understand health information you don't understand? | 1                | 2                   | 3                  | 4                  | 5             |
|                                 | Do you often participate in healthful activities with fellow patients?                        | 1                | 2                   | 3                  | 4                  | 5             |

|                                |                                                                                                   |   |   |   |   |   |
|--------------------------------|---------------------------------------------------------------------------------------------------|---|---|---|---|---|
|                                | Can you prepare for each medical visit?                                                           | 1 | 2 | 3 | 4 | 5 |
|                                | Do you often discuss your health issues with others besides doctors?                              | 1 | 2 | 3 | 4 | 5 |
|                                | Can you put the health information you obtain in daily life into practice?                        | 1 | 2 | 3 | 4 | 5 |
|                                | Can you ask doctors what you want to know and what you don't understand about treatment measures? | 1 | 2 | 3 | 4 | 5 |
|                                | If the doctor's explanation is unclear, will you continue asking for clarification?               | 1 | 2 | 3 | 4 | 5 |
|                                | Can you have family or friends accompany you to the doctor?                                       | 1 | 2 | 3 | 4 | 5 |
| Health Improvement Willingness | Are you willing to invest time in health issues?                                                  | 1 | 2 | 3 | 4 | 5 |
|                                | Are you willing to pay attention to your health needs?                                            | 1 | 2 | 3 | 4 | 5 |
|                                | Are you willing to spend energy to improve your health?                                           | 1 | 2 | 3 | 4 | 5 |
|                                | Are you willing to improve your health by changing your lifestyle?                                | 1 | 2 | 3 | 4 | 5 |
| Economic Support               | Are you able to afford the cost of medical treatment?                                             | 1 | 2 | 3 | 4 | 5 |
|                                | Are you able to afford the cost of managing your health?                                          | 1 | 2 | 3 | 4 | 5 |

Connor-Davidson Resilience Scale (CD-RISC-10)

|    | Item                                                                        | Never | Rarely | Sometimes | Often | Always |
|----|-----------------------------------------------------------------------------|-------|--------|-----------|-------|--------|
| 1  | I can adapt flexibly when changes occur.                                    | 1     | 2      | 3         | 4     | 5      |
| 2  | I can handle difficulties.                                                  | 1     | 2      | 3         | 4     | 5      |
| 3  | When facing problems, I respond with humor.                                 | 1     | 2      | 3         | 4     | 5      |
| 4  | Accumulated experiences make me stronger.                                   | 1     | 2      | 3         | 4     | 5      |
| 5  | After experiencing illness or hardship, I have a strong ability to recover. | 1     | 2      | 3         | 4     | 5      |
| 6  | Even when faced with obstacles, I can achieve my goals.                     | 1     | 2      | 3         | 4     | 5      |
| 7  | Under pressure, I can concentrate and think about problems.                 | 1     | 2      | 3         | 4     | 5      |
| 8  | I do not get upset by failure.                                              | 1     | 2      | 3         | 4     | 5      |
| 9  | When facing life's challenges, I consider myself a strong person.           | 1     | 2      | 3         | 4     | 5      |
| 10 | I can deal with unpleasant feelings, such as anger.                         | 1     | 2      | 3         | 4     | 5      |

### Social Impact Scale (SIS)

|    | Item                                                                                                                                       | Strongly Agree | Agree | Disagree | Strongly Disagree |
|----|--------------------------------------------------------------------------------------------------------------------------------------------|----------------|-------|----------|-------------------|
| 1  | The financial difficulties brought by this illness have affected my feelings.                                                              | 4              | 3     | 2        | 1                 |
| 2  | This disease has affected my work.                                                                                                         | 4              | 3     | 2        | 1                 |
| 3  | My boss or colleagues will discriminate against me because of my illness.                                                                  | 4              | 3     | 2        | 1                 |
| 4  | The financial difficulties brought by this illness have affected my interpersonal relationships.                                           | 4              | 3     | 2        | 1                 |
| 5  | Some people think my abilities could be better.                                                                                            | 4              | 3     | 2        | 1                 |
| 6  | Since getting sick, I am not as respected as before.                                                                                       | 4              | 3     | 2        | 1                 |
| 7  | I feel that I am not a healthy person anymore.                                                                                             | 4              | 3     | 2        | 1                 |
| 8  | I feel that others will worry about catching my illness through contact with me (such as shaking hands with me or eating food I prepared). | 4              | 3     | 2        | 1                 |
| 9  | I feel that others avoid me because of my illness.                                                                                         | 4              | 3     | 2        | 1                 |
| 10 | I feel that some relatives exclude me because of my illness.                                                                               | 4              | 3     | 2        | 1                 |
| 11 | I think others believe I should blame myself for getting this disease.                                                                     | 4              | 3     | 2        | 1                 |
| 12 | I don't want people around me to know I have this disease.                                                                                 | 4              | 3     | 2        | 1                 |
| 13 | I worry that someone will tell others about my disease without my permission.                                                              | 4              | 3     | 2        | 1                 |
| 14 | I feel that I need to keep my illness a secret.                                                                                            | 4              | 3     | 2        | 1                 |

|    |                                                                          |   |   |   |   |
|----|--------------------------------------------------------------------------|---|---|---|---|
| 15 | I feel that some friends avoid me because of my illness.                 | 4 | 3 | 2 | 1 |
| 16 | Compared to before, I need to be more certain that others care about me. | 4 | 3 | 2 | 1 |
| 17 | I feel lonelier than before.                                             | 4 | 3 | 2 | 1 |
| 18 | Because of my disease, I feel unequal in my interactions with others.    | 4 | 3 | 2 | 1 |
| 19 | I think I am at least partially to blame for getting sick.               | 4 | 3 | 2 | 1 |
| 20 | Compared to before, my abilities have declined.                          | 4 | 3 | 2 | 1 |
| 21 | Because of my illness, I encounter some embarrassing situations.         | 4 | 3 | 2 | 1 |
| 22 | Because of my disease, people around me seem awkward and nervous.        | 4 | 3 | 2 | 1 |
| 23 | Because of my disease, I sometimes feel useless.                         | 4 | 3 | 2 | 1 |
| 24 | The changes in my appearance have affected my interactions with others.  | 4 | 3 | 2 | 1 |
